# Supplementary material for: Hollow gold and platinum nanoparticles by a transmetallation reaction in an organic solution
Source: Royal Society of Chemistry journal article supplement (doi:10.1039/b418566h), 2005-01-01
Supplement: b418566h.pdf [file b418566h.pdf]

Supplementary information for article b418566h

### Supporting Information S1:

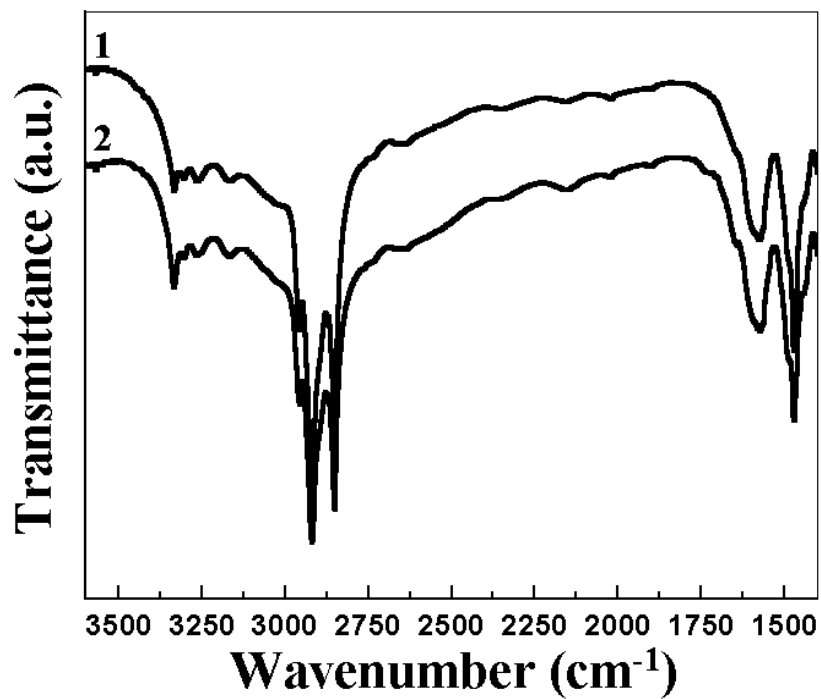

S1. FTIR spectra of ODA capped Ag nanoparticles before (curve 1) and after reaction with hydrophobized chloroaurate ions (curve 2)
